# Supplementary material for: Growth of InN quantum dots to nanorods: a competition between nucleation and growth rates
Source: Royal Society of Chemistry journal article supplement (doi:10.1039/c5ce00053j), 2015-01-01
Supplement: c5ce00053j1.pdf [file c5ce00053j1.pdf]

Supporting Information :

### Growth of InN Quantum Dots to Nanorods: A Competition between Nucleation and Growth Rates

Kishore K. Madapu, Sandip Dhara, S. Polaki, S. Amirthapandian, and A. K. Tyagi

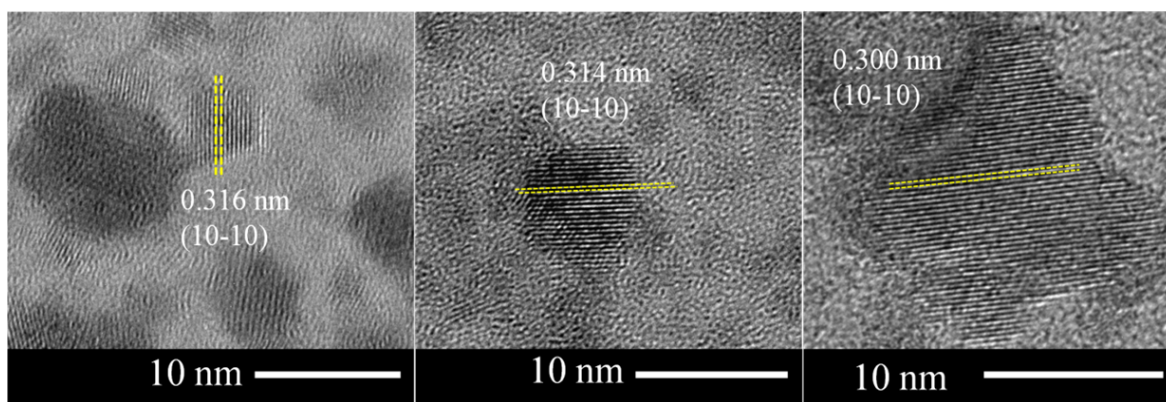

Fig. S1. HRTEM analysis of different quantum dots showing the presence of similar (10–10) planes.

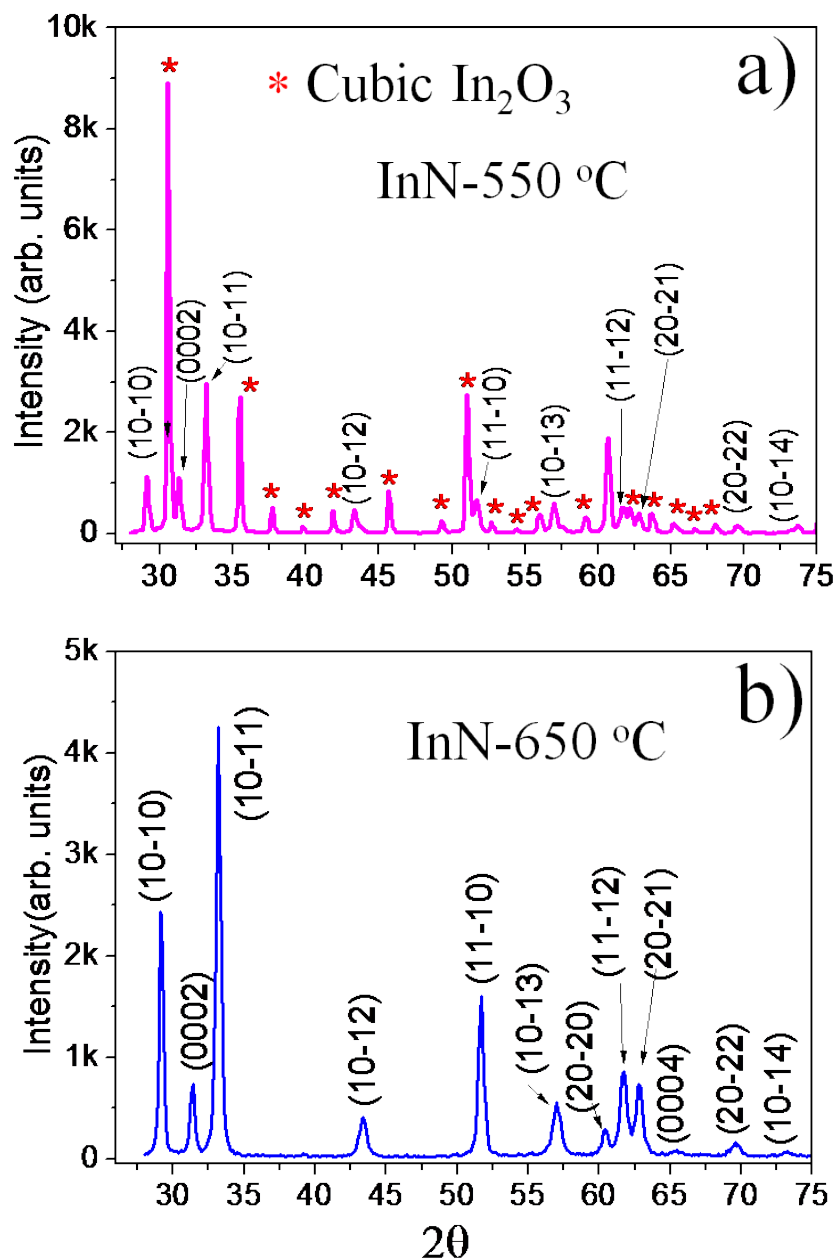

Fig. S2. XRD spectra with diffraction peaks corresponding to (10-10), (0002), (10-11), (10-12), (11-10), (10-13), (20-20), (11-12), (20-21), (0004), (20-22) and (10-14) crystalline planes corresponding to wurtzite InN phase (JCPDS # 50-1239) of typical a) nanoparticles grown at 550 °C along with the substantial presence of cubic  $\text{In}_2\text{O}_3$  and b) NRs grown at 650 °C.

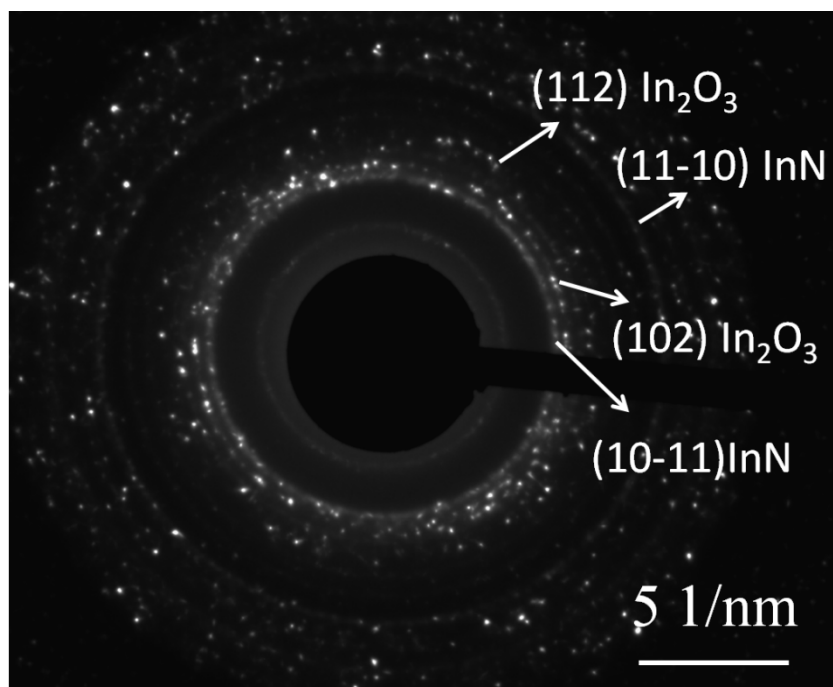

Fig. S3. SAED pattern of nanostructures grown at low temperature of 550 °C showing the crystalline planes corresponding to  $\text{InN}$  and  $\text{In}_2\text{O}_3$  phases.
